# Supplementary material
Source: PubMed Central journal article supplement (PMC8563383)

**Supplementary Table S1: Observations by Dose Level (Efficacy and PD-L1)**

| <b>Variables</b>                       | <b>Dose Level 1/2</b> | <b>Dose Level 3/4</b> | <b>P-Value</b> | <b>Total</b>  |
|----------------------------------------|-----------------------|-----------------------|----------------|---------------|
| <b>Sample Size</b>                     | <b>N = 16</b>         | <b>N = 17</b>         |                | <b>N = 33</b> |
| <b>ORR Status - n (%)</b>              |                       |                       |                |               |
| No Response                            | 10 (83.33)            | 11 (84.62)            | >0.99          | 21 (84)       |
| Response                               | 2 (16.67)             | 2 (15.38)             |                | 4 (16)        |
| Unknown                                | 4                     | 4                     |                | 8             |
| <b>ORR irRECIST Status - n (%)</b>     |                       |                       |                |               |
| No Response                            | 9 (75)                | 11 (84.62)            | 0.645          | 20 (80)       |
| Response                               | 3 (25)                | 2 (15.38)             |                | 5 (20)        |
| Unknown                                | 4                     | 4                     |                | 8             |
| <b>Clinical Benefit Status - n (%)</b> |                       |                       |                |               |
| No Benefit                             | 4 (33.33)             | 6 (46.15)             | 0.688          | 10 (40)       |
| Benefit                                | 8 (66.67)             | 7 (53.85)             |                | 15 (60)       |
| Unknown                                | 4                     | 4                     |                | 8             |
| <b>PD-L1 Tumor (%)</b>                 |                       |                       |                |               |
| > 1% Baseline                          | 5 (38.46)             | 5 (31.25)             | 0.714          | 10 (34.48)    |
| > 1% Timepoint 1                       | 6 (46.15)             | 5 (33.33)             | 0.700          | 11 (39.29)    |
| > 1% Timepoint 2                       | 3 (42.86)             | 2 (33.33)             | >0.99          | 5 (38.46)     |
| <b>PD-L1 Lymphocyte (%)</b>            |                       |                       |                |               |
| > 1% Baseline                          | 2 (16.67)             | 5 (31.25)             | 0.662          | 7 (25)        |
| > 1% Timepoint 1                       | 1 (11.11)             | 6 (40)                | 0.191          | 7 (29.17)     |
| > 1% Timepoint 2                       | 1 (14.29)             | 2 (33.33)             | 0.559          | 3 (23.08)     |

**Supplementary Table S2: Tissue for correlative analyses**

|                    | <b>Biopsy collected</b> | <b>TILs</b> | <b>CD8</b> | <b>FoxP3</b> | <b>CD8/<br/>FoxP3<br/>Ratio</b> | <b>PDL1<br/>(Tumor)</b> | <b>PDL1<br/>(Immune)</b> | <b>IDO</b> |
|--------------------|-------------------------|-------------|------------|--------------|---------------------------------|-------------------------|--------------------------|------------|
| <b>Baseline</b>    | 33                      | 22          | 28         | 28           | 28                              | 28                      | 28                       | 28         |
| <b>Timepoint 1</b> | 28                      | 24          | 28         | 28           | 28                              | 28                      | 22                       | 28         |
| <b>Timepoint 2</b> | 14                      | 12*         | 14         | 14           | 14                              | 13                      | 13                       | 14         |

**Supplementary Table S3: Tumor Infiltrating Lymphocyte Data**

| Baseline      |                                                                                  |             | Timepoint 1 |                                                                          |             | Timepoint 2 |                                                                |             |
|---------------|----------------------------------------------------------------------------------|-------------|-------------|--------------------------------------------------------------------------|-------------|-------------|----------------------------------------------------------------|-------------|
| TIL range     | Tumor type (n)                                                                   | Percent TIL | TIL range   | Tumor Type (n)                                                           | Percent TIL | TIL range   | Tumor Type (n)                                                 | Percent TIL |
| <1%           | Parotid (1)<br>ACC (2)<br>Cervical Squamous (1)<br>Breast (1)<br>Small Bowel (1) | 0           | <1%         | PEComa (1)<br>CC (1)<br>Acinic cell Carcinoma (1)<br>ACC (2)<br>Lung (1) | 0           | <1%         | PEComa (1)<br>ACC (1)                                          | 0           |
|               |                                                                                  |             |             |                                                                          |             |             |                                                                |             |
| 1-5%          | Lung (1)<br>Breast (5)<br>CC (1)<br>Liver (1)<br>ACC (1)                         | 3           | 1-5%        | Breast (6)<br>Cervical squamous (1)<br>Endometrial (1)<br>CC (1)         | 3           | 1-5%        | Parotid (1)<br>Breast (2)<br>ACC (1)                           | 3           |
|               |                                                                                  |             |             |                                                                          |             |             |                                                                |             |
| 5-10%         | Rectal (1)<br>Apocrine AdenoCa (1)<br>Ovarian (1)                                | 8           | 5-10%       | Liver (1)<br>Rectal (1)<br>Small bowel (1)<br>Breast (1)                 | 6.5         | 5-10%       | Rectal (1)<br>Endometrial (1)<br>Small bowel (1)<br>Breast (1) | 7           |
|               |                                                                                  |             |             |                                                                          |             |             |                                                                |             |
| 10-25%        | Breast (1)<br>Gastric (1)                                                        | 12.5        | 10-25%      | Ovarian (1)<br>Gastric (1)                                               | 15          | 10-25%      | *Breast (2)                                                    | 15          |
|               |                                                                                  |             |             |                                                                          |             |             |                                                                |             |
| >25           | Pancreas (1)                                                                     | 25          | >25         | Apocrine AdenoCa (1)<br>Breast (2)                                       | 52.5        | >25         | N/A                                                            | N/A         |
|               |                                                                                  |             |             |                                                                          |             |             |                                                                |             |
| <b>Median</b> |                                                                                  | <b>3%</b>   |             |                                                                          | <b>3%</b>   |             |                                                                | <b>3%</b>   |

## Supplementary Figures

# Supplementary Figure S1: Progression-Free and Overall Survival

**A Progression Free Survival**

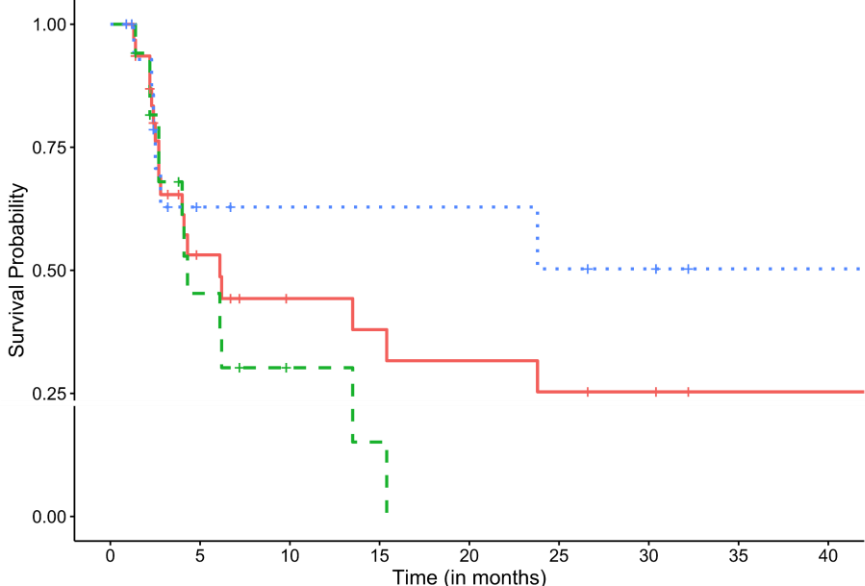

Group  
 Overall  
 Dose Level 1/2  
 Dose Level 3/4

Number at risk

| Group          | 0  | 5  | 10 | 15 | 20 | 25 | 30 | 35 | 40 |
|----------------|----|----|----|----|----|----|----|----|----|
| Overall        | 33 | 12 | 7  | 6  | 5  | 4  | 3  | 1  | 1  |
| Dose Level 1/2 | 17 | 6  | 2  | 1  | 0  | 0  | 0  | 0  | 0  |
| Dose Level 3/4 | 16 | 6  | 5  | 5  | 5  | 4  | 3  | 1  | 1  |

**B Overall Survival**

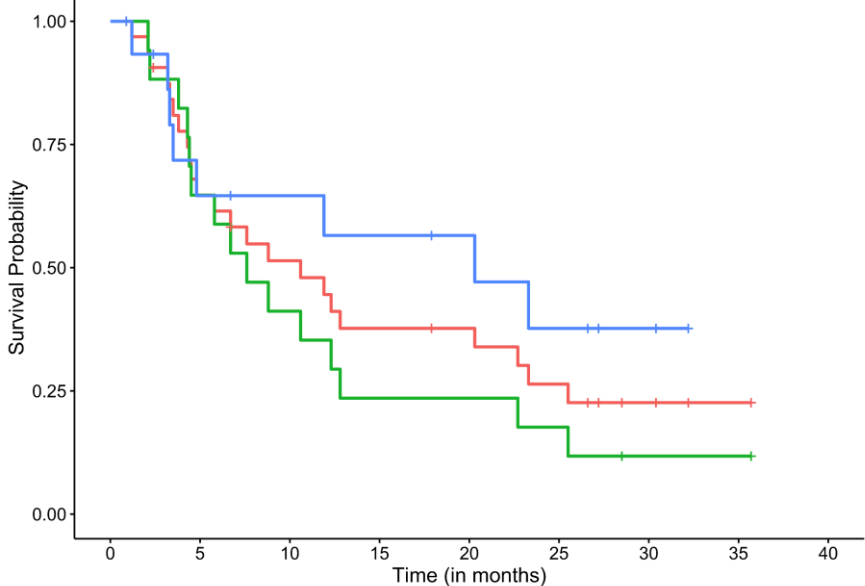

Group  
 Overall  
 Dose Level 1/2  
 Dose Level 3/4

Number at risk

| Group          | 0  | 5  | 10 | 15 | 20 | 25 | 30 | 35 | 40 |
|----------------|----|----|----|----|----|----|----|----|----|
| Overall        | 33 | 20 | 15 | 11 | 10 | 7  | 3  | 1  | 0  |
| Dose Level 1/2 | 17 | 11 | 7  | 4  | 4  | 3  | 1  | 1  | 0  |
| Dose Level 3/4 | 16 | 9  | 8  | 7  | 6  | 4  | 2  | 0  | 0  |

## Supplementary Figure S2: CD8/FoxP3 Ratio

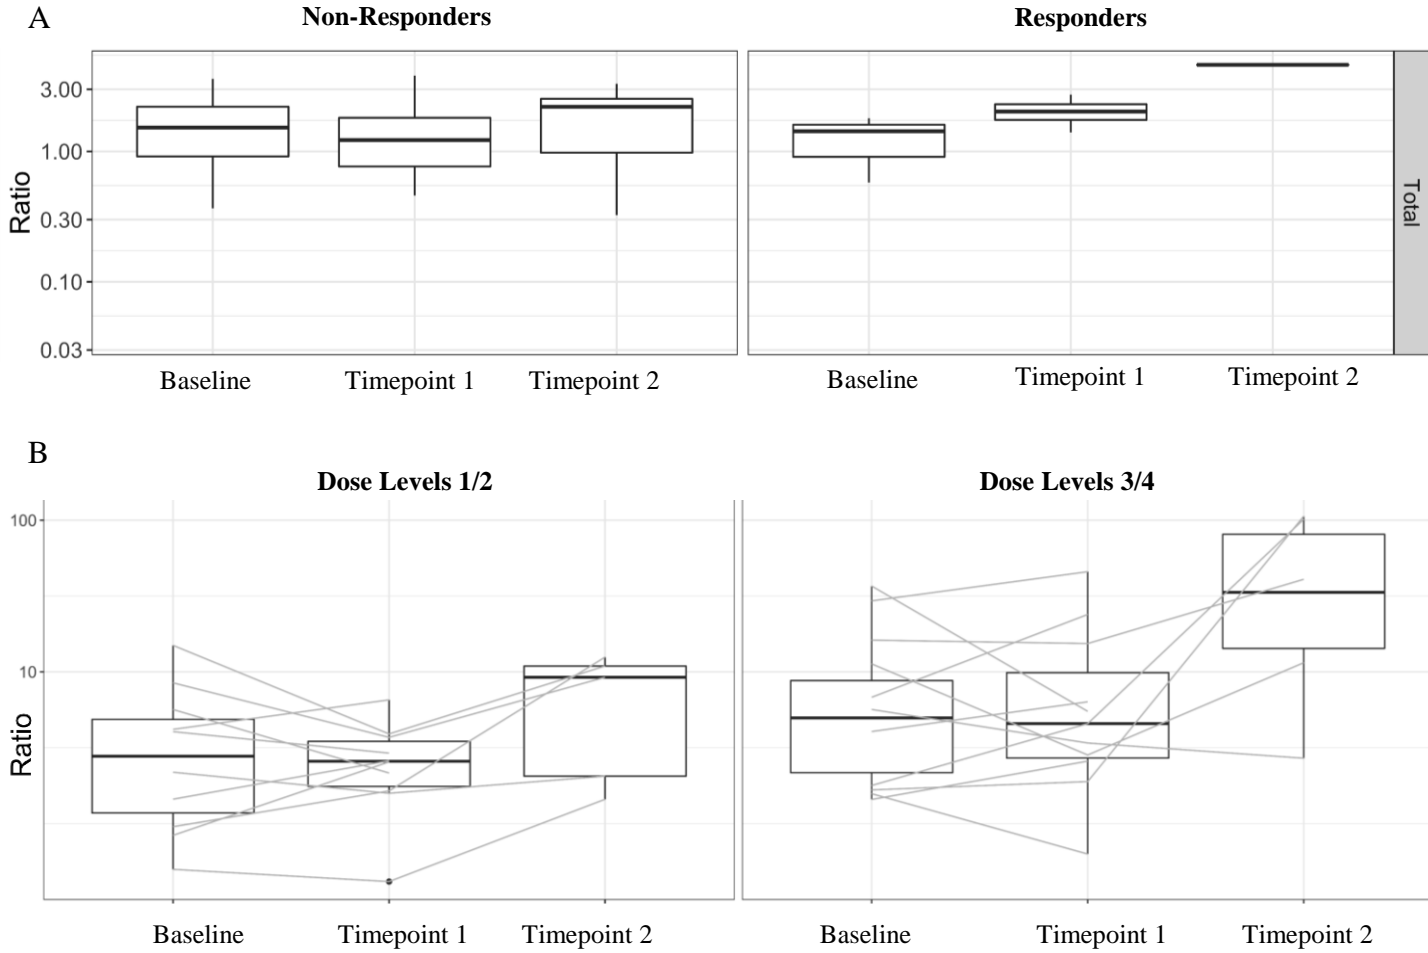

**C**

| Marker                                      | Time Point  | n  | Density Median [Q1, Q3] | Density Mean (SD) | Density {Min, Max} | P-value* |
|---------------------------------------------|-------------|----|-------------------------|-------------------|--------------------|----------|
| <b>CD8/FoxP3 Ratio</b><br>(All dose levels) | Baseline    | 26 | 4.11 [1.7, 6.61]        | 6.94 (8.77)       | {0.5, 36.8}        |          |
|                                             | Timepoint 1 | 28 | 3.56 [2.06, 6.25]       | 7.16 (9.79)       | {0.41, 45.77}      |          |
|                                             | Timepoint 2 | 14 | 9.03 [2.6, 12.79]       | 15.37 (25.79)     | {0.77, 101.35}     |          |
| <b>CD8/FoxP3 Ratio</b><br>(Dose Level 1/2)  | Baseline    | 11 | 2.78 (1.2, 4.91)        | 4.18 (4.3)        | {0.5, 14.95}       | 0.12     |
|                                             | Timepoint 1 | 13 | 2.26 (2.05, 3.72)       | 3.58 (3.86)       | {0.41, 15.33}      | 0.11     |
|                                             | Timepoint 2 | 8  | 5.89 (1.89, 11.98)      | 6.65 (5.43)       | {0.77, 12.88}      | 0.01     |
| <b>CD8/FoxP3 Ratio</b><br>(Dose Level 3/4)  | Baseline    | 15 | 4.97 (2.21, 9.04)       | 8.97 (10.66)      | {1.44, 36.8}       |          |
|                                             | Timepoint 1 | 15 | 5.89 (2.92, 11.95)      | 10.26 (12.24)     | {0.55, 45.77}      |          |
|                                             | Timepoint 2 | 6  | 12.54 (6.5, 24.41)      | 27 (37.46)        | {2.7, 101.35}      |          |

# Supplementary Figure S3: CD8 Density

All dose levels

A

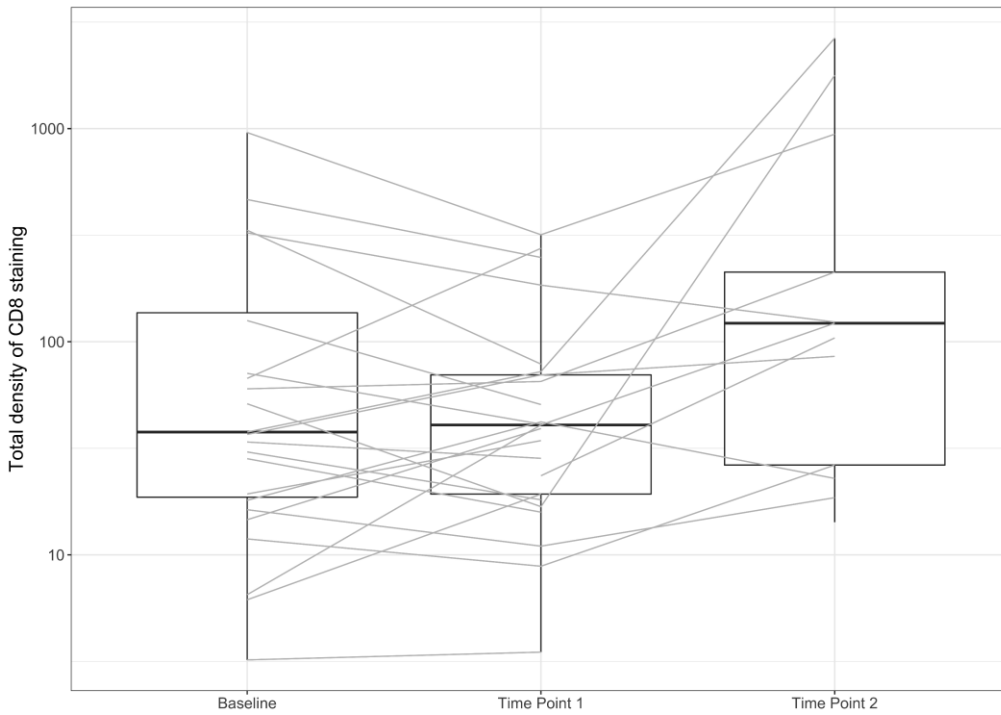

B

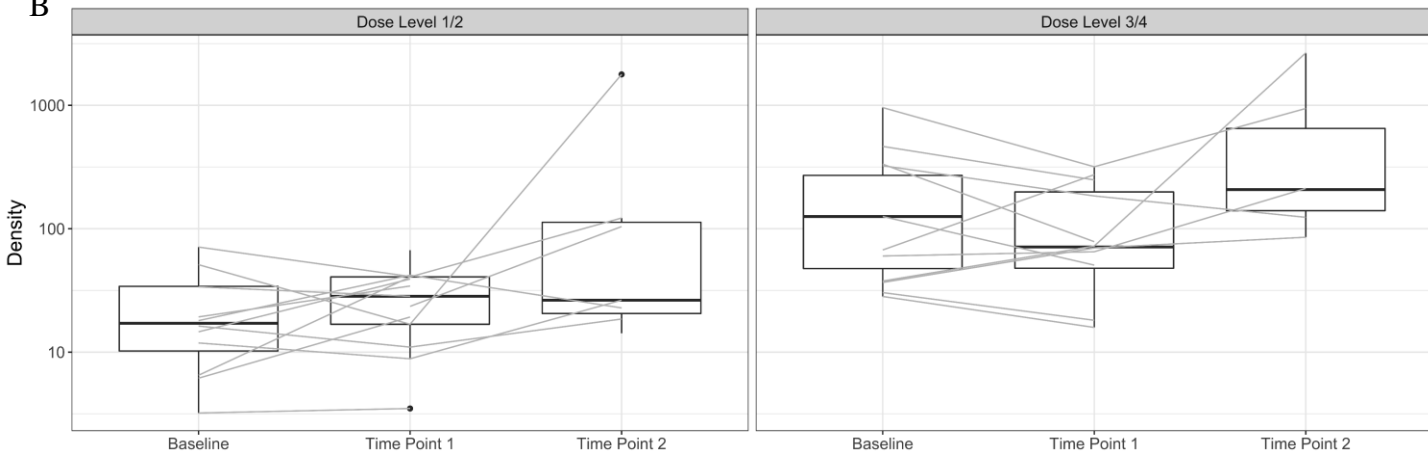

C

| Marker                           | Time Point  | n  | Density Median [Q1, Q3] | Density Mean (SD) | Density {Min, Max} | P-value* |
|----------------------------------|-------------|----|-------------------------|-------------------|--------------------|----------|
| <b>CD8<br/>(All dose levels)</b> | Baseline    | 27 | 37.69 [18.66, 137.19]   | 126.52 (203.61)   | {3.21, 958.37}     |          |
|                                  | Timepoint 1 | 28 | 40.87 [23.62, 87.45]    | 107.59 (200.65)   | {3.5, 1044.1}      |          |
|                                  | Timepoint 2 | 14 | 107.44 [33.23, 193.81]  | 509.28 (955.5)    | {14.23, 3297.5}    |          |
| <b>CD8<br/>(Dose Level 1/2)</b>  | Baseline    | 12 | 17.15 [10.54, 34.12]    | 23.91 (20.4)      | {3.21, 71.05}      | < 0.001  |
|                                  | Timepoint 1 | 13 | 28.37 [17.66, 40.7]     | 28.7 (17.85)      | {3.5, 66.92}       | 0.002    |
|                                  | Timepoint 2 | 8  | 40.09 [21.58, 104.22]   | 266.15 (612.59)   | {14.23, 1779.26}   | 0.05     |
| <b>CD8<br/>(Dose Level 3/4)</b>  | Baseline    | 15 | 123.63 [48.9, 279.92]   | 208.6 (245.81)    | {28.27, 958.37}    |          |
|                                  | Timepoint 1 | 15 | 83.23 [42.51, 191.84]   | 175.97 (258.03)   | {10.16, 1044.1}    |          |
|                                  | Timepoint 2 | 6  | 175.5 [127.5, 924.03]   | 833.44 (1275.81)  | {67.12, 3297.5}    |          |

**Supplementary Figure S4: FoxP3 Density**

**A**

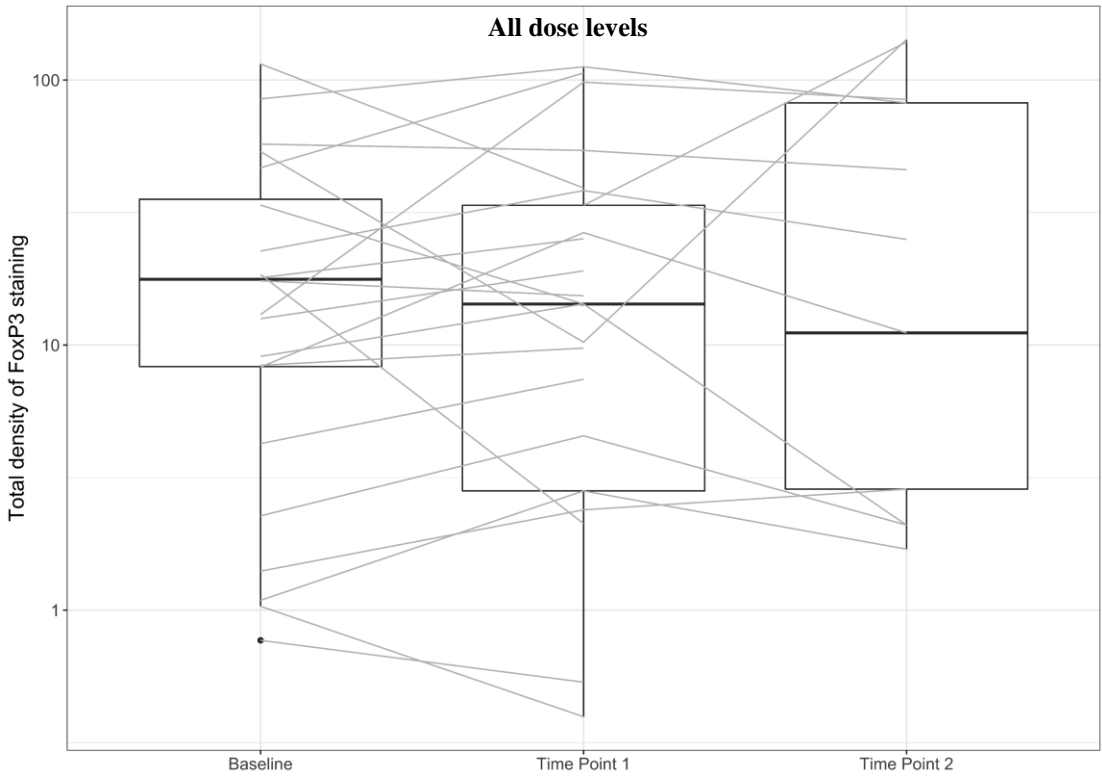

**B**

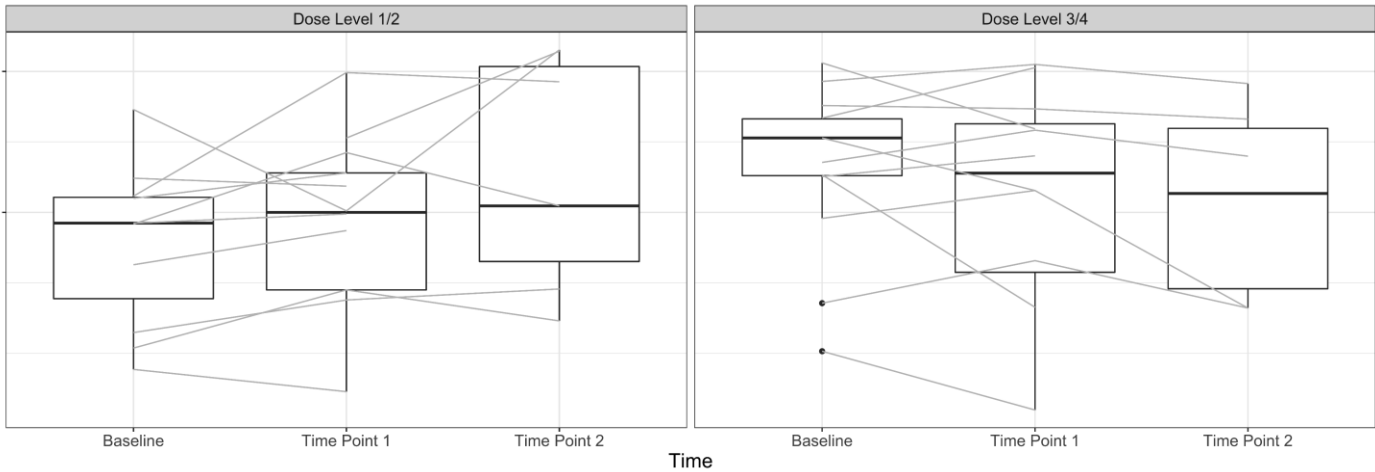

**C**

| Marker                             | Time Point  | n  | Density Median [Q1, Q3] | Density Mean (SD) | Density {Min, Max} | P-value* |
|------------------------------------|-------------|----|-------------------------|-------------------|--------------------|----------|
| <b>FoxP3<br/>(All dose levels)</b> | Baseline    | 26 | 17.72 [8.29, 35.5]      | 26.56 (27.83)     | {0.77, 114.96}     |          |
|                                    | Timepoint 1 | 28 | 14.38 [5.2, 39.61]      | 30.78 (44.39)     | {0.4, 216.64}      |          |
|                                    | Timepoint 2 | 14 | 13.42 [3.29, 79.55]     | 78.28 (151.6)     | {1.38, 576.73}     |          |
| <b>FoxP3<br/>(Dose Level 1/2)</b>  | Baseline    | 11 | 8.39 [2.83, 12.8]       | 12.13 (14.88)     | {0.77, 53.67}      | 0.008    |
|                                    | Timepoint 1 | 13 | 12.53 [2.24, 26.57]     | 19.88 (26.18)     | {0.53, 98.17}      | 0.41     |
|                                    | Timepoint 2 | 8  | 8.34 [4.13, 94.58]      | 47.69 (61.29)     | {1.38, 142.17}     | 0.63     |
| <b>FoxP3<br/>(Dose Level 3/4)</b>  | Baseline    | 15 | 33.73 [18.22, 46.05]    | 37.14 (30.68)     | {1.03, 114.96}     |          |
|                                    | Timepoint 1 | 15 | 18.57 [7.55, 49.35]     | 40.23 (54.83)     | {0.4, 216.64}      |          |
|                                    | Timepoint 2 | 6  | 30.8 [5.78, 65.07]      | 119.06 (225.85)   | {2.09, 576.73}     |          |



# Supplementary Figure S5: CD8, FoxP3 and ratio by tumor type in 'cancer' ROI

CD8, FoxP3 and Ratio by Tumor Type in 'Cancer' ROI

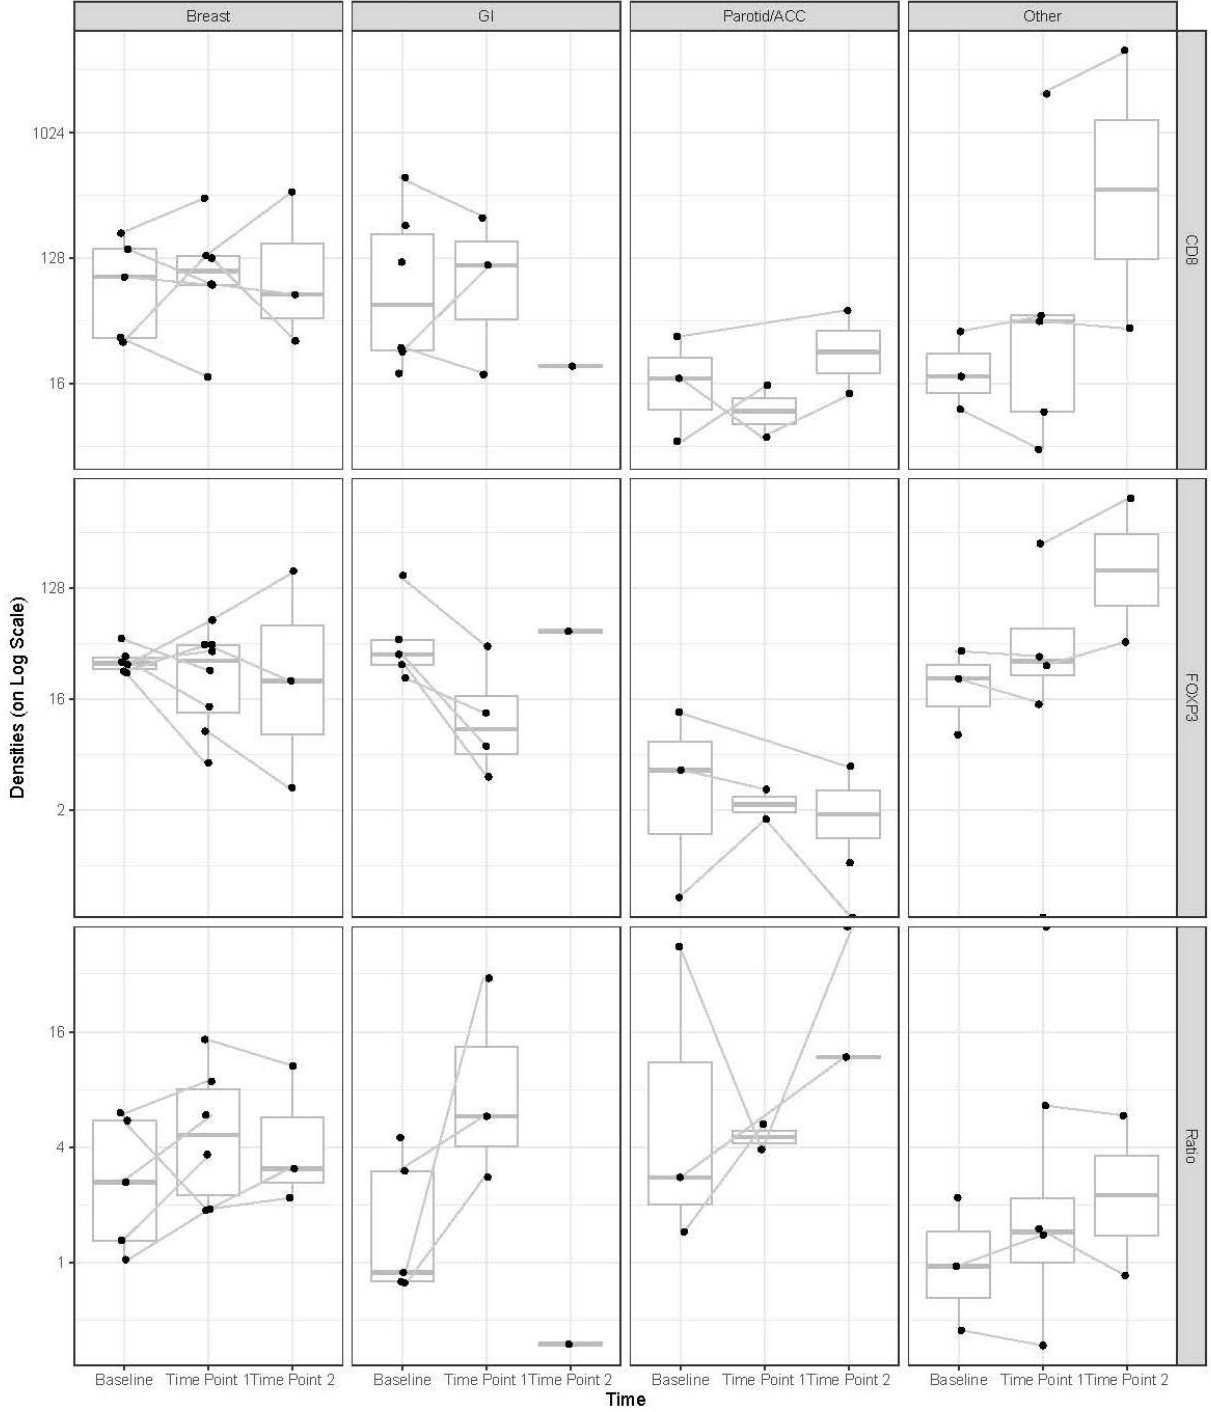

# Supplementary Figure S6: CD8, FoxP3 and ratio by tumor type in 'tumor' ROI

CD8, FoxP3 and Ratio by Tumor Type in 'Tumor' ROI

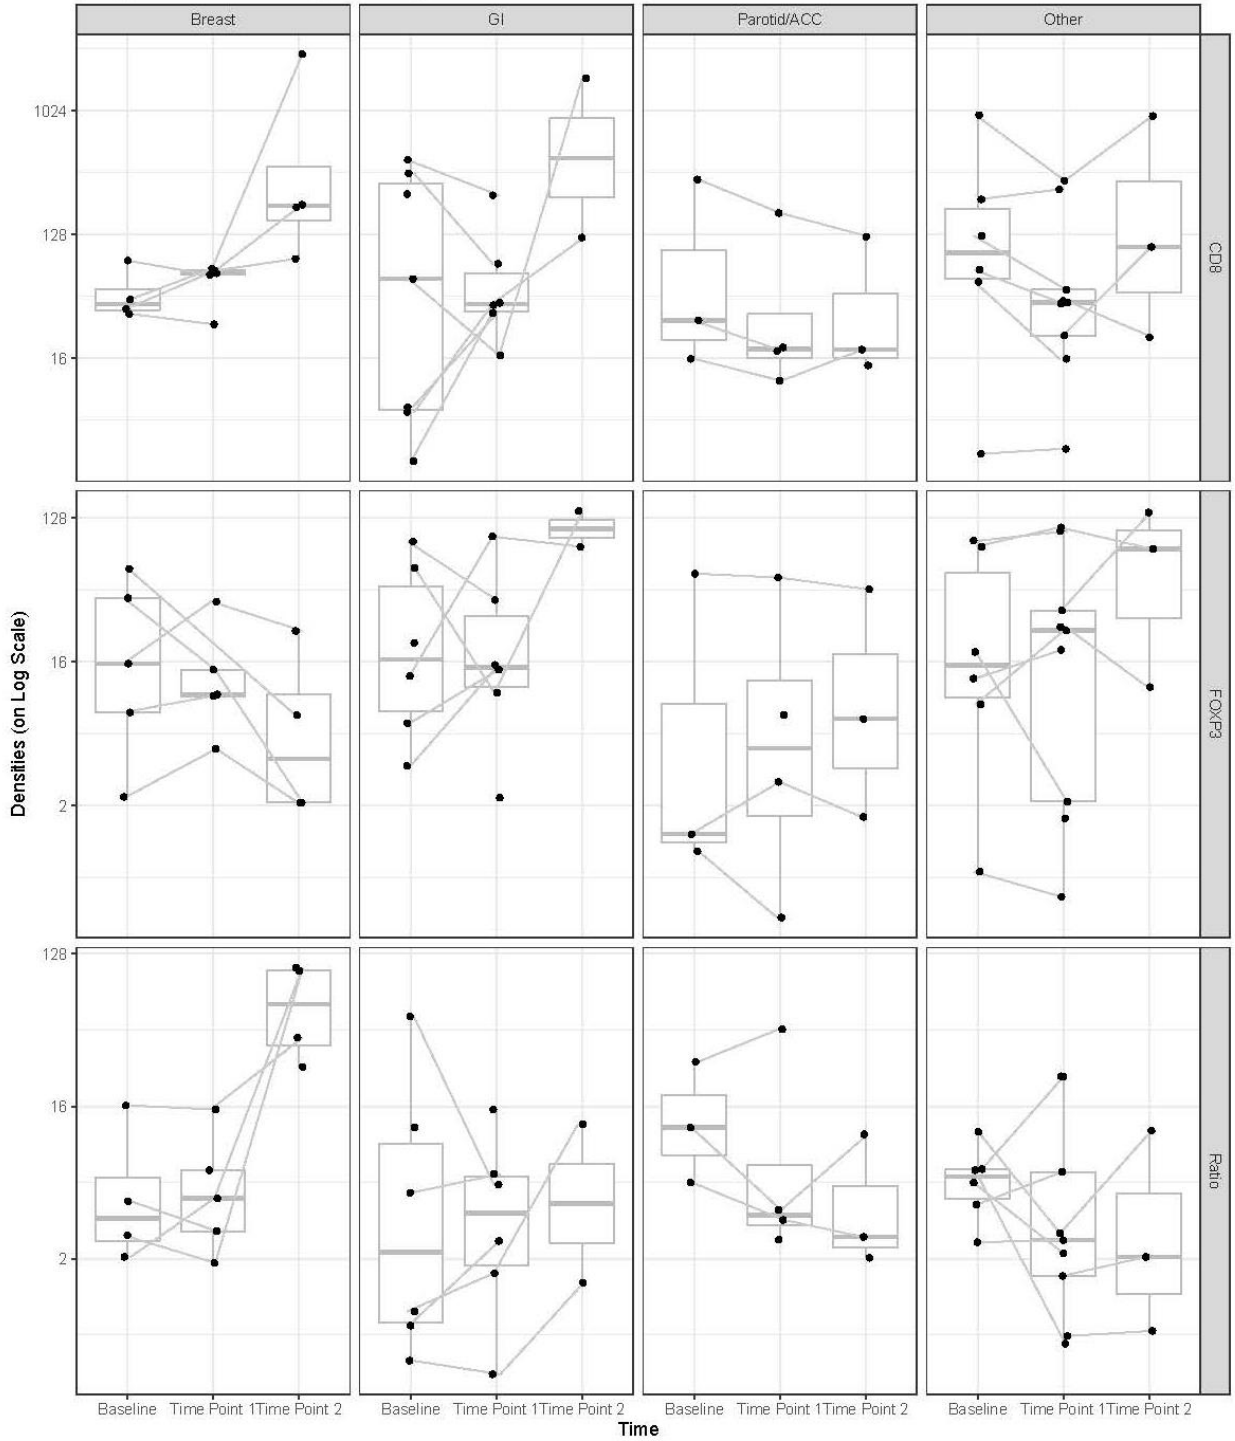

Supplementary Figure S7: CD8, density in 'cancer' vs. 'tumor' ROIs

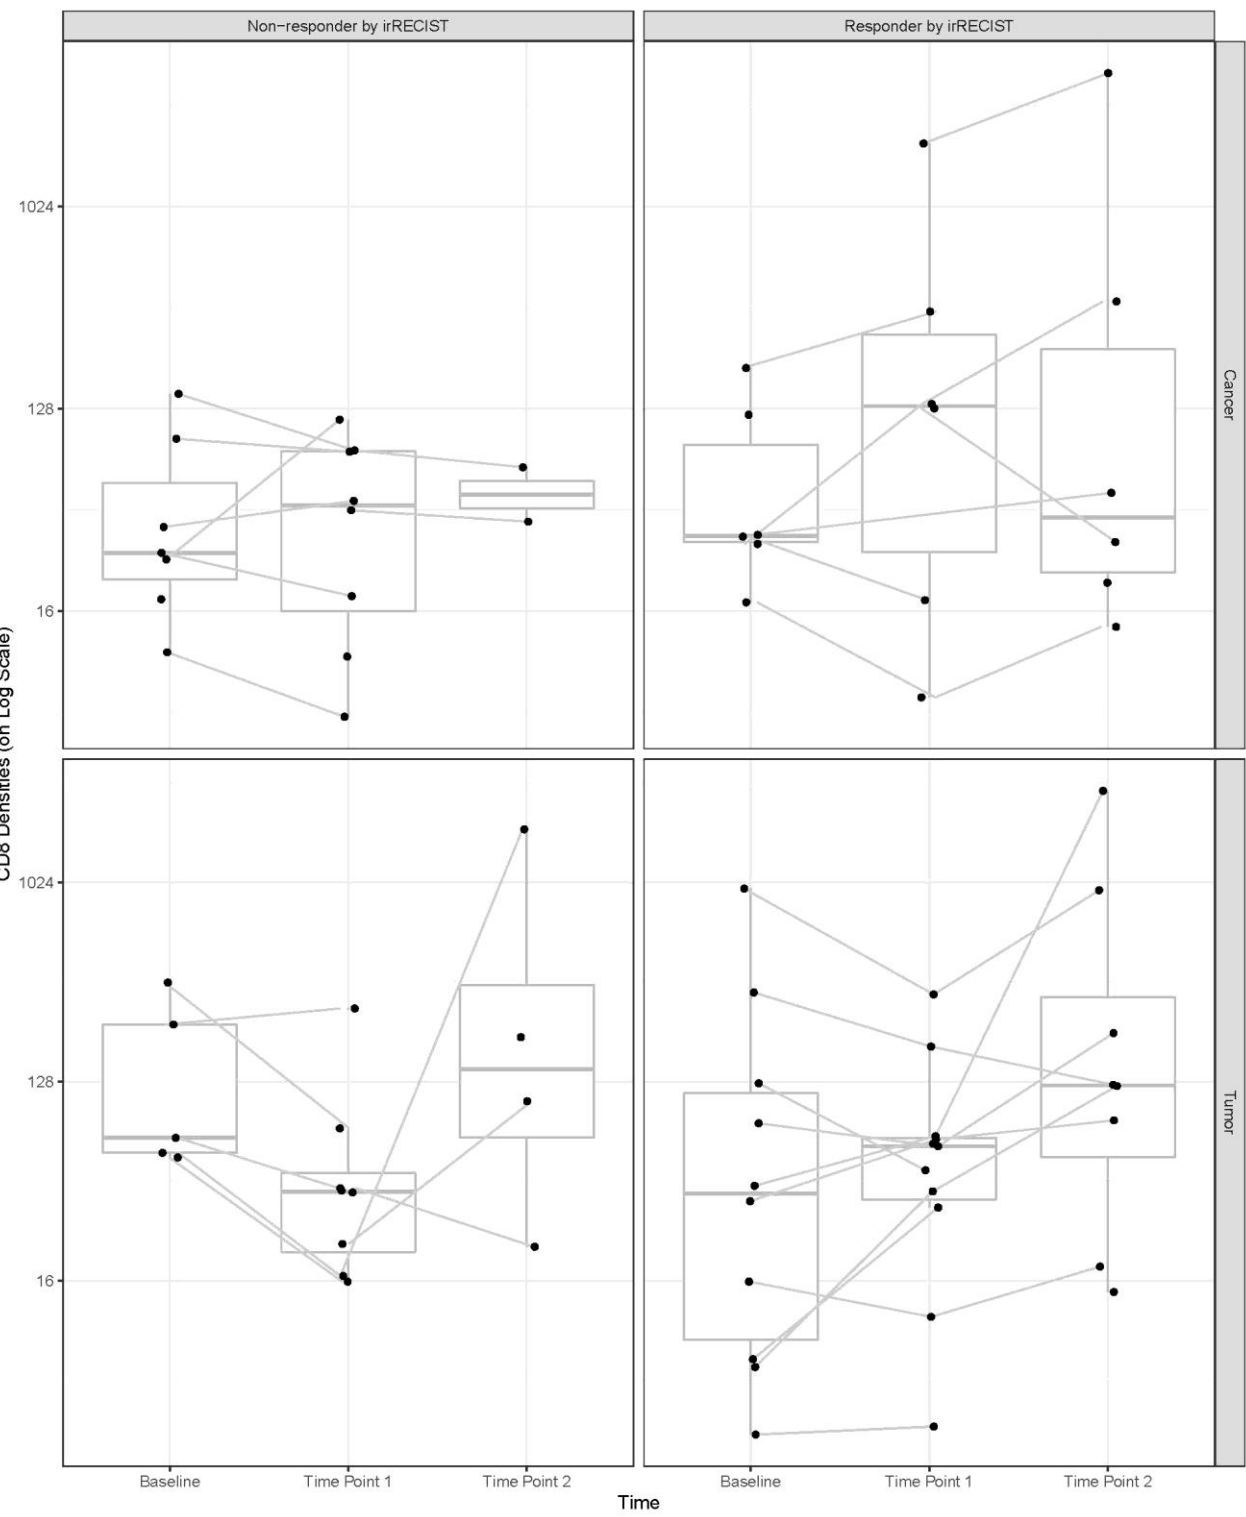

# Supplementary Figure S8: PD-L1 and IDO Staining

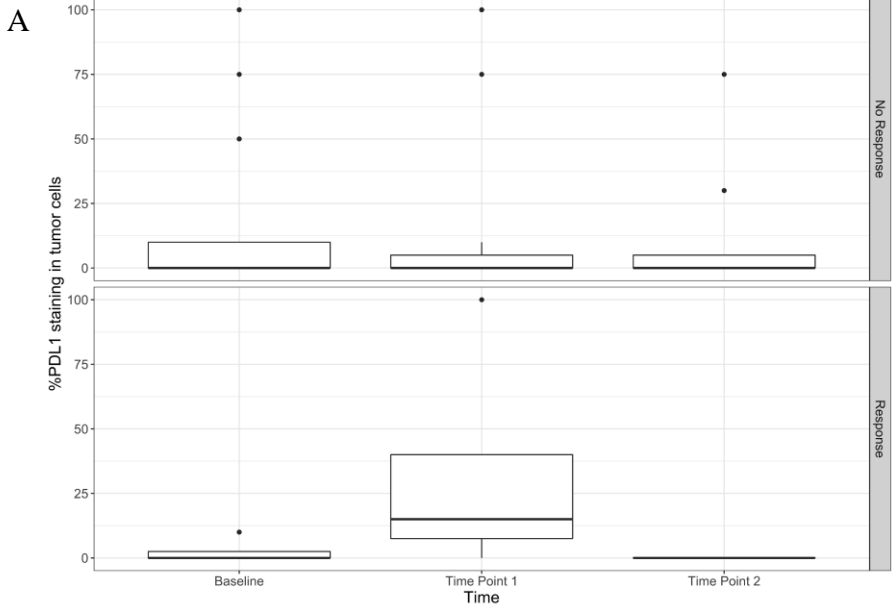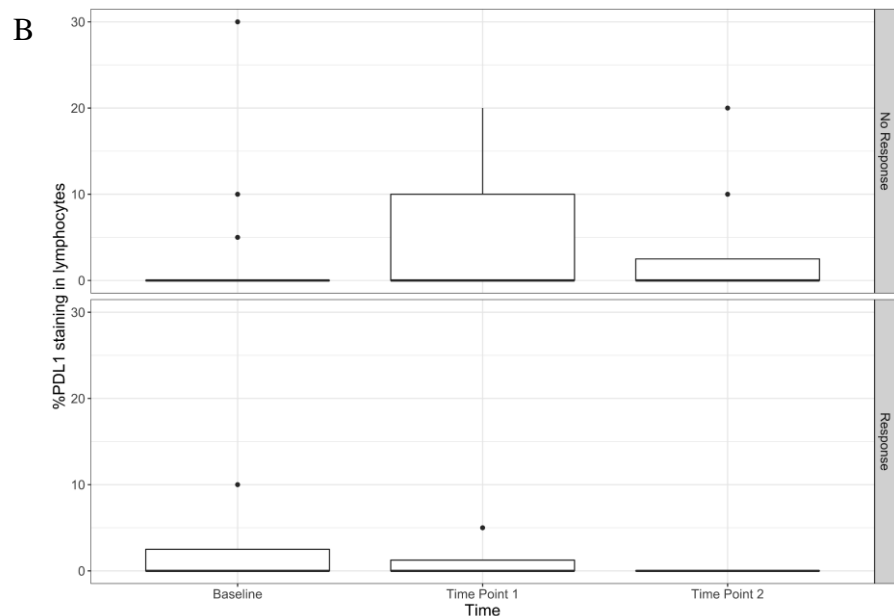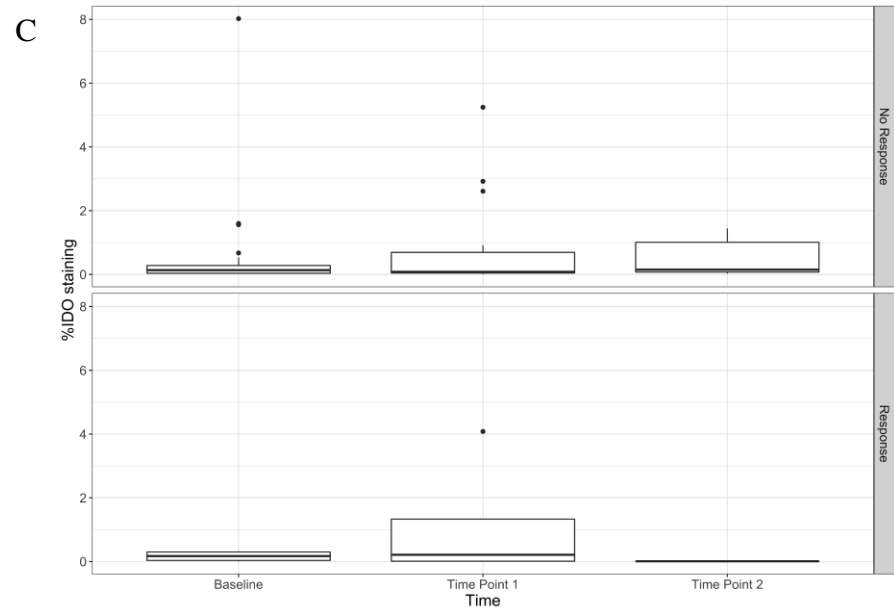

Supplement: NIHMS1717455-supplement-1.pdf [file NIHMS1717455-supplement-1.pdf]
